# Supplementary material for: Efficient and labor-saving Ru/C catalysts for the transformation of levulinic acid into γ-valerolactone under mild reaction conditions
Source: Royal Society of Chemistry journal article supplement (doi:10.1039/d3re00497j), 2023-11-08
Supplement: d3re00497j1.pdf [file d3re00497j1.pdf]

## Efficient and labor-saving Ru/C catalysts for the transformation of levulinic acid into $\gamma$ -valerolactone under mild reaction conditions

Zaira Ruiz-Bernal<sup>a</sup>, M. Ángeles Lillo-Ródenas<sup>a</sup> and M. Carmen Román-Martínez<sup>a</sup>

<sup>a</sup>MCMA group, Department of Inorganic Chemistry and Materials Institute (IUMA), Faculty of Sciences, University of Alicante, Ap. 99, E-03080 Alicante, Spain. E-mail: mcroman@ua.es; Tel.: +34965903975.

### Supplementary information

Tables and figures are presented in the order in which they are mentioned in the manuscript

**Table S1** Parameters of the HPLC analysis.

|                                                                         |
|-------------------------------------------------------------------------|
| <b>Column Zorbax Eclipse XDB-C8 (4.6 x 150 mm, 5 <math>\mu</math>m)</b> |
| <b>Detector: DAD (wavelength: 210 and 266 nm)</b>                       |
| Isocratic: 1 mL/min                                                     |
| Temperature: 25 °C                                                      |
| Injection volume: 10 $\mu$ L                                            |
| Analysis time: 15 min                                                   |

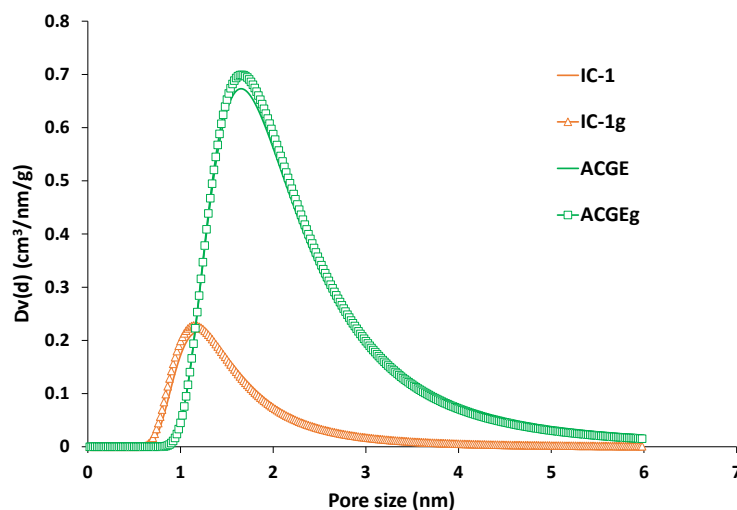

**Fig. S1** Pore size distribution of carbons IC-1, IC-1g, ACGE and ACGEg. Estimated from N<sub>2</sub> adsorption data using the Dubinin-Astakhov equation <sup>1</sup>.

**Table S2** Textural properties of carbon supports and catalysts (as prepared and reduced).

| Sample                   | $S_{\text{BET}}^{\text{a}}$<br>( $\text{m}^2/\text{g}$ ) | $V_{\text{DR, CO}_2}^{\text{b}}$<br>( $\text{cm}^3/\text{g}$ ) | $V_{\text{DR, N}_2}^{\text{a}}$<br>( $\text{cm}^3/\text{g}$ ) | $V_{\text{meso, N}_2}^{\text{a}}$<br>( $\text{cm}^3/\text{g}$ ) | $V_{\text{meso, Hg}}^{\text{c}}$<br>( $\text{cm}^3/\text{g}$ ) | $V_{\text{T, meso}}$<br>( $\text{cm}^3/\text{g}$ ) | $V_{\text{macro, Hg}}^{\text{c}}$<br>( $\text{cm}^3/\text{g}$ ) |
|--------------------------|----------------------------------------------------------|----------------------------------------------------------------|---------------------------------------------------------------|-----------------------------------------------------------------|----------------------------------------------------------------|----------------------------------------------------|-----------------------------------------------------------------|
| IC-1                     | 542                                                      | 0.19                                                           | 0.22                                                          | 0.04                                                            | 0.55                                                           | 0.59                                               | 0.00                                                            |
| IC-1g                    | 571                                                      | 0.21                                                           | 0.23                                                          | 0.04                                                            | 0.28                                                           | 0.32                                               | 0.13                                                            |
| Ru/IC-1                  | 498                                                      | 0.18                                                           | 0.21                                                          | 0.04                                                            | 0.55                                                           | 0.59                                               | 0.00                                                            |
| Ru/IC-1g                 | 557                                                      | 0.20                                                           | 0.22                                                          | 0.04                                                            | 0.28                                                           | 0.32                                               | 0.13                                                            |
| Ru <sup>R</sup> /IC-1    | 554                                                      | 0.21                                                           | 0.22                                                          | 0.04                                                            | 0.55                                                           | 0.59                                               | 0.00                                                            |
| Ru <sup>R</sup> /IC-1g   | 560                                                      | 0.21                                                           | 0.22                                                          | 0.04                                                            | 0.28                                                           | 0.32                                               | 0.13                                                            |
| IC-2                     | 2081                                                     | 0.60                                                           | 0.92                                                          | 0.07                                                            | 0.04                                                           | 0.12                                               | 1.17                                                            |
| Ru/IC-2                  | 1899                                                     | 0.55                                                           | 0.84                                                          | 0.06                                                            | 0.04                                                           | 0.10                                               | 1.17                                                            |
| Ru <sup>R</sup> /IC-2    | 1777                                                     | 0.55                                                           | 0.78                                                          | 0.05                                                            | 0.04                                                           | 0.09                                               | 1.17                                                            |
| ACGE                     | 1920                                                     | 0.50                                                           | 0.81                                                          | 0.09                                                            | 0.29                                                           | 0.38                                               | 0.01                                                            |
| ACGEg                    | 1991                                                     | 0.52                                                           | 0.85                                                          | 0.09                                                            | 0.22                                                           | 0.31                                               | 0.05                                                            |
| Ru/ACGE                  | 1876                                                     | 0.50                                                           | 0.80                                                          | 0.08                                                            | 0.29                                                           | 0.37                                               | 0.01                                                            |
| Ru/ACGEg                 | 1914                                                     | 0.51                                                           | 0.82                                                          | 0.09                                                            | 0.22                                                           | 0.31                                               | 0.05                                                            |
| Ru <sup>R</sup> /ACGE    | 1988                                                     | 0.54                                                           | 0.85                                                          | 0.09                                                            | 0.29                                                           | 0.38                                               | 0.01                                                            |
| Ru <sup>R</sup> /ACGEg   | 1949                                                     | 0.51                                                           | 0.84                                                          | 0.08                                                            | 0.22                                                           | 0.30                                               | 0.05                                                            |
| SA-30                    | 1587                                                     | 0.35                                                           | 0.68                                                          | 0.31                                                            | 0.40                                                           | 0.71                                               | 0.41                                                            |
| Ru/SA-30                 | 1465                                                     | 0.33                                                           | 0.63                                                          | 0.28                                                            | 0.40                                                           | 0.68                                               | 0.41                                                            |
| Ru <sup>R</sup> /SA-30   | 1505                                                     | 0.31                                                           | 0.64                                                          | 0.30                                                            | 0.40                                                           | 0.70                                               | 0.41                                                            |
| WV-1100                  | 1713                                                     | 0.37                                                           | 0.70                                                          | 0.30                                                            | 0.51                                                           | 0.81                                               | 0.20                                                            |
| Ru/WV-1100               | 1671                                                     | 0.38                                                           | 0.68                                                          | 0.30                                                            | 0.51                                                           | 0.81                                               | 0.20                                                            |
| Ru <sup>R</sup> /WV-1100 | 1771                                                     | 0.38                                                           | 0.73                                                          | 0.31                                                            | 0.51                                                           | 0.82                                               | 0.20                                                            |

a: Parameters calculated from the N<sub>2</sub> adsorption isotherms as indicated in the text; b: Parameters calculated from the CO<sub>2</sub> adsorption isotherms as indicated in the text c: Parameters determined by Hg porosimetry.

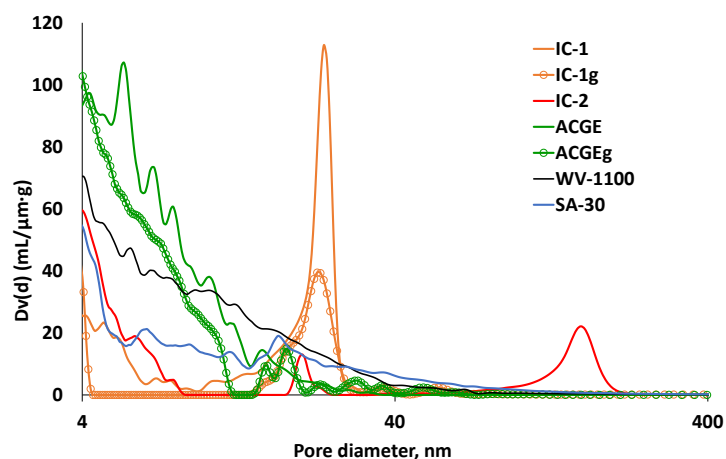

Fig. S2 Pore size distribution obtained by Hg porosimetry.

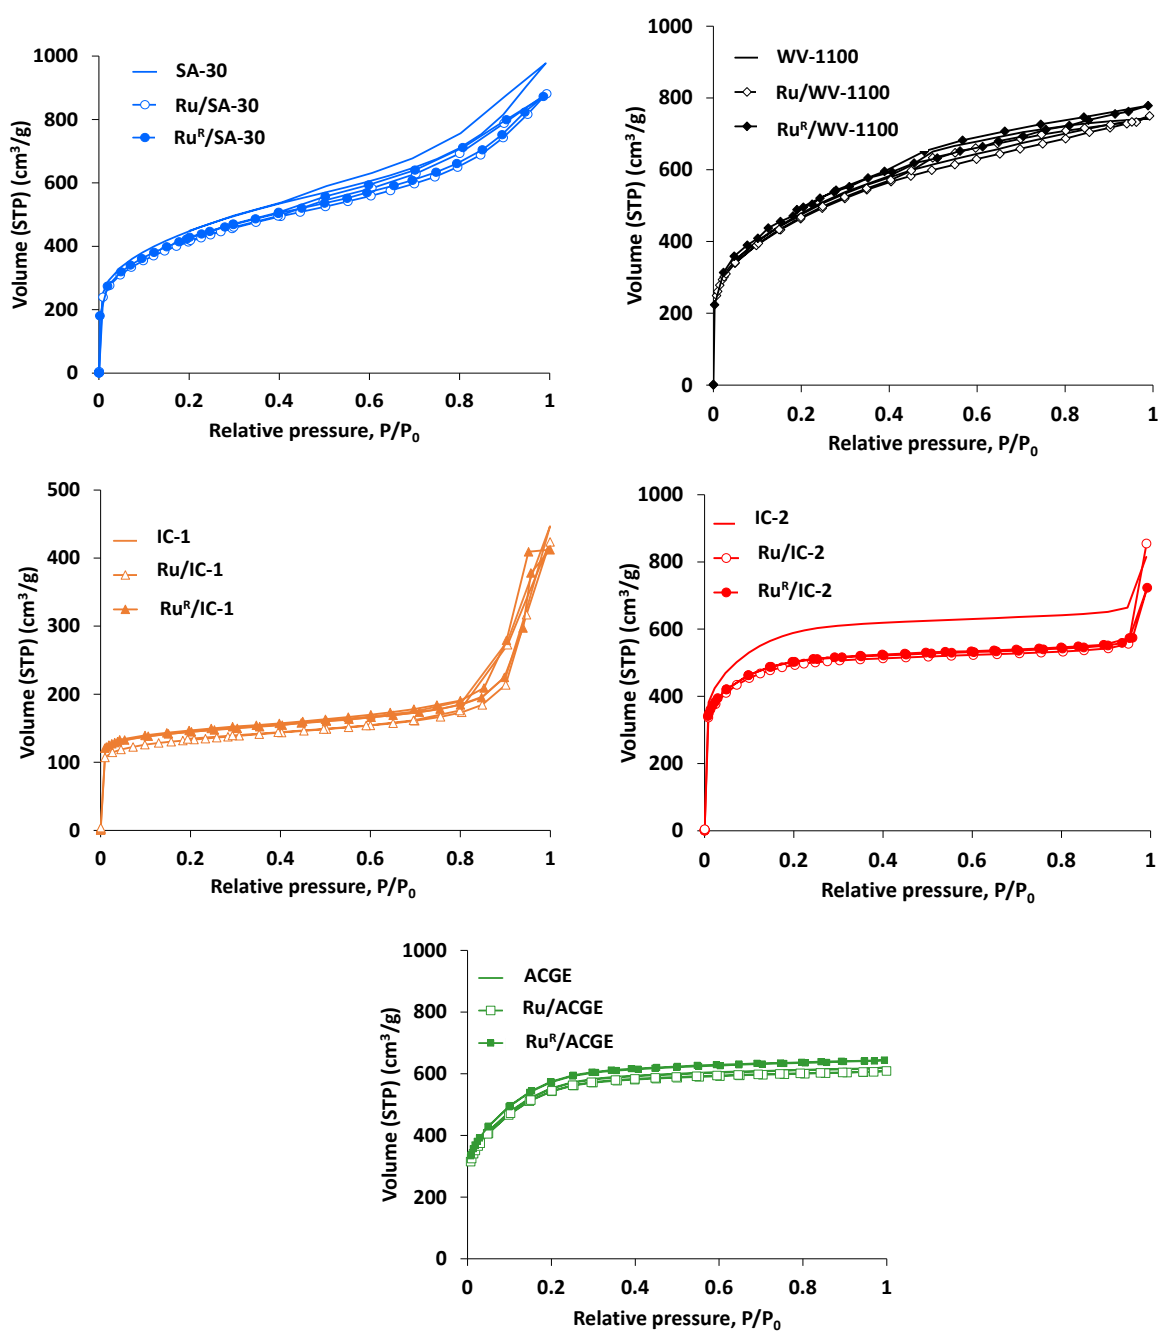

Fig. S3 N<sub>2</sub> adsorption-desorption isotherms at -196 °C for supports, and un-reduced and reduced catalysts.

**Table S3** Average pore size of carbon materials and catalysts determined by N<sub>2</sub> adsorption data with the Quantachrome Quadrawin software (based in NLDFT).

| Sample                   | Average pore size <sup>a</sup> (nm) |
|--------------------------|-------------------------------------|
| IC-1                     | 3.7                                 |
| IC-1g                    | 4.1                                 |
| Ru/IC-1                  | 3.9                                 |
| Ru/IC-1g                 | 4.5                                 |
| Ru <sup>R</sup> /IC-1    | 4.2                                 |
| Ru <sup>R</sup> /IC-1g   | 4.3                                 |
| IC-2                     | 2.4                                 |
| Ru/IC-2                  | 3.0                                 |
| Ru <sup>R</sup> /IC-2    | 2.5                                 |
| ACGE                     | 2.0                                 |
| ACGEg                    | 2.0                                 |
| Ru/ACGE                  | 2.0                                 |
| Ru/ACGEg                 | 2.0                                 |
| Ru <sup>R</sup> /ACGE    | 2.0                                 |
| Ru <sup>R</sup> /ACGEg   | 2.0                                 |
| SA-30                    | 3.8                                 |
| Ru/SA-30                 | 3.7                                 |
| Ru <sup>R</sup> /SA-30   | 3.6                                 |
| WV-1100                  | 2.7                                 |
| Ru/WV-1100               | 2.9                                 |
| Ru <sup>R</sup> /WV-1100 | 2.7                                 |

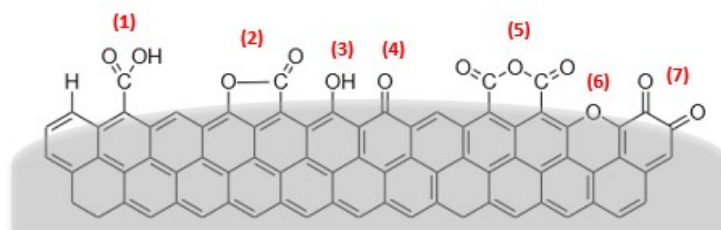

**Fig. S4** Oxygen functional groups (OFG) on carbon materials.

| Entry | OFG        | Decomposition products | T <sub>d</sub> (°C) |
|-------|------------|------------------------|---------------------|
| (1)   | Carboxylic | CO <sub>2</sub>        | 250-473             |
| (2)   | Lactone    | CO <sub>2</sub>        | 190-650             |
| (3)   | Phenol     | CO                     | 673-773             |
| (4)   | Carbonyl   | CO                     | 773-900             |
| (5)   | Anhydride  | CO+CO <sub>2</sub>     | 350-627             |
| (6)   | Ether      | CO                     | 773                 |
| (7)   | Quinone    | CO                     | 773-980             |

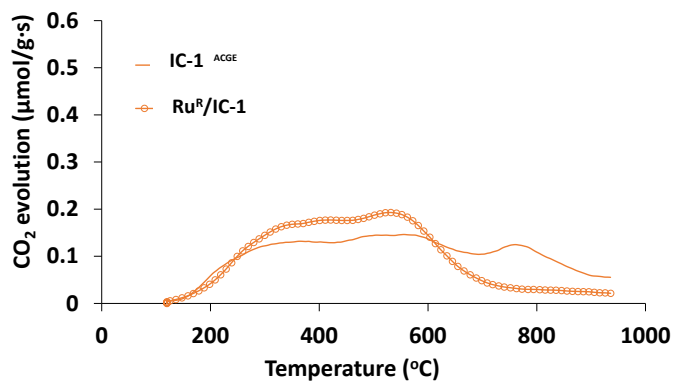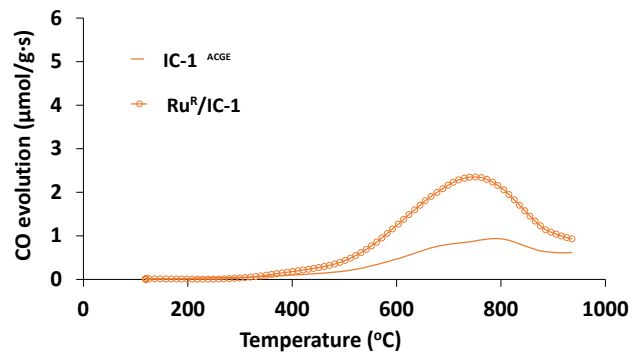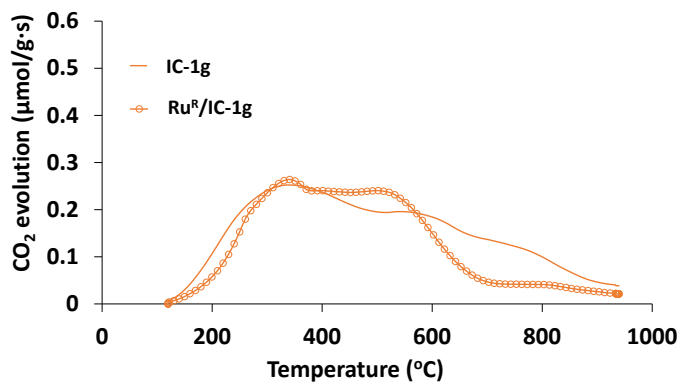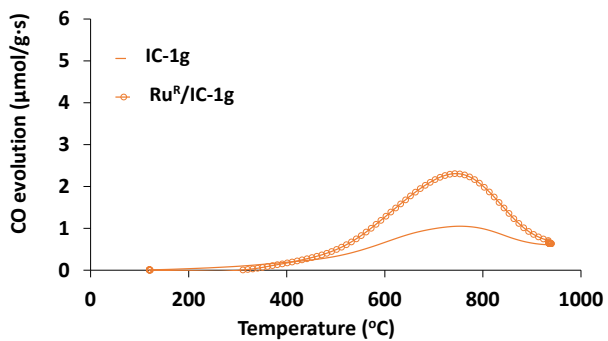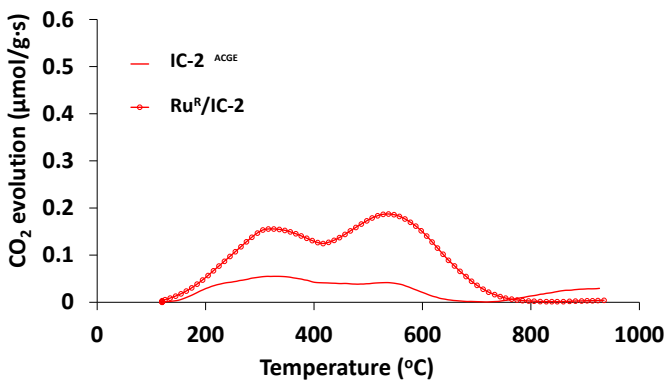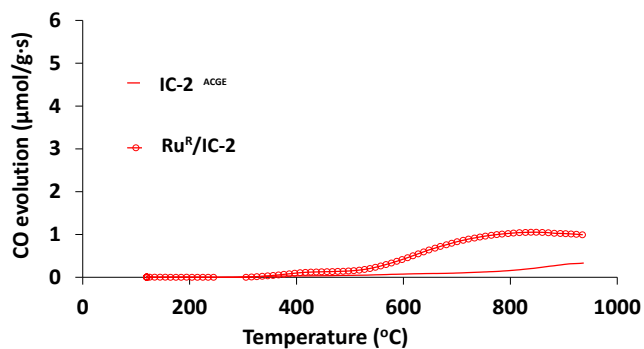

Table S4. Decomposition temperature of OFG on carbon materials in TPD experiments <sup>2,3</sup>.

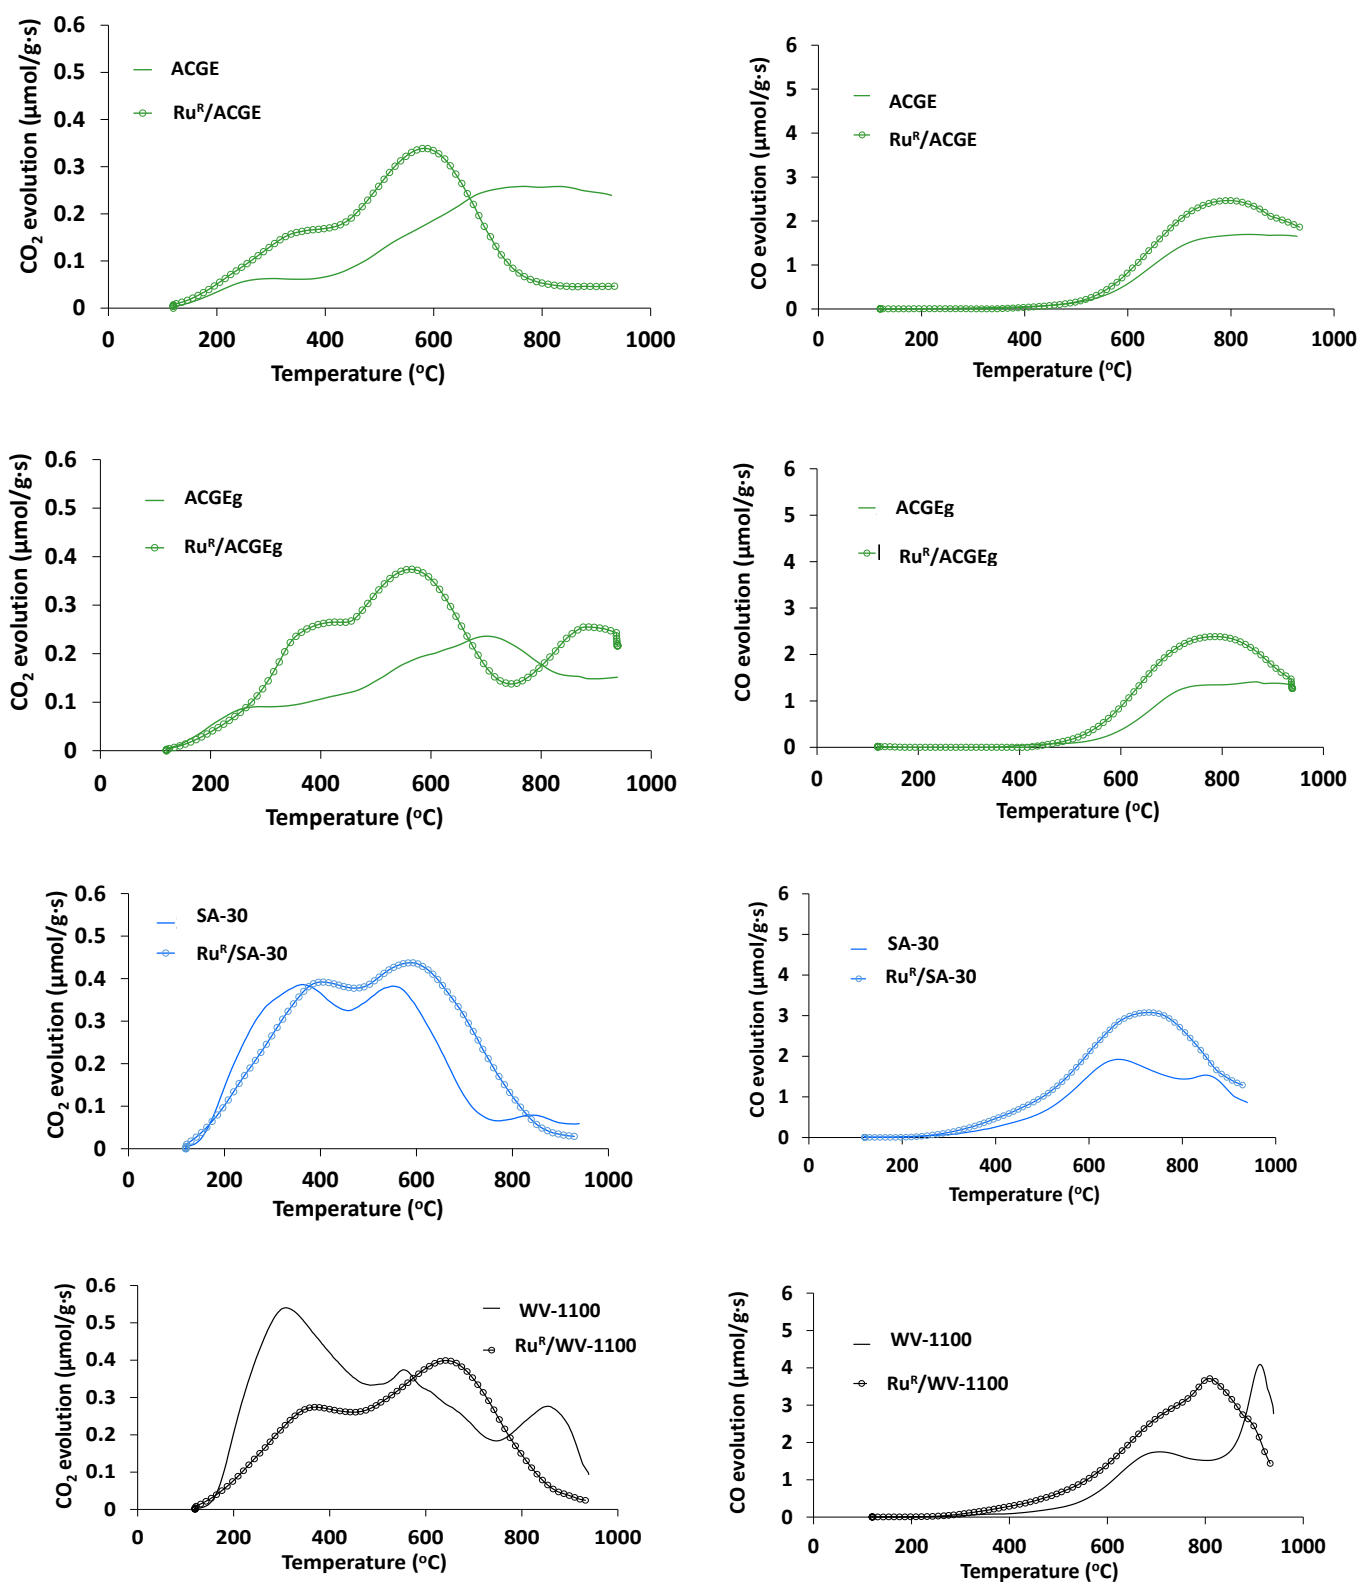

Fig. S5. TPD spectra of carbon supports and reduced catalysts: CO<sub>2</sub> and CO evolution (be aware of the different scale in y-axis).

Table S5. Amount of CO<sub>2</sub> and CO evolved in TPD experiments, and the corresponding total oxygen of carbon supports and the corresponding as prepared and reduced catalysts.

| Sample                | CO <sub>2</sub><br>(μmol/g) | CO<br>(μmol/g) | O <sub>total</sub><br>(wt. %) |
|-----------------------|-----------------------------|----------------|-------------------------------|
| IC-1                  | 258                         | 928            | 2.3                           |
| Ru <sup>R</sup> /IC-1 | 239                         | 2135           | 4.2                           |
| IC-1g                 | 374                         | 1172           | 3.1                           |

|                          |     |      |     |
|--------------------------|-----|------|-----|
| Ru <sup>R</sup> /IC-1g   | 313 | 2071 | 4.3 |
| IC-2                     | 68  | 208  | 0.6 |
| Ru <sup>R</sup> /IC-2    | 209 | 1026 | 2.3 |
| ACGE                     | 351 | 1559 | 3.6 |
| Ru <sup>R</sup> /ACGE    | 361 | 2169 | 4.6 |
| ACGEg                    | 342 | 1267 | 3.1 |
| Ru <sup>R</sup> /ACGEg   | 509 | 2123 | 5.0 |
| SA-30                    | 539 | 2065 | 5.0 |
| Ru <sup>R</sup> /SA-30   | 615 | 3168 | 7.0 |
| WV-1100                  | 735 | 2202 | 5.9 |
| Ru <sup>R</sup> /WV-1100 | 526 | 3151 | 6.7 |

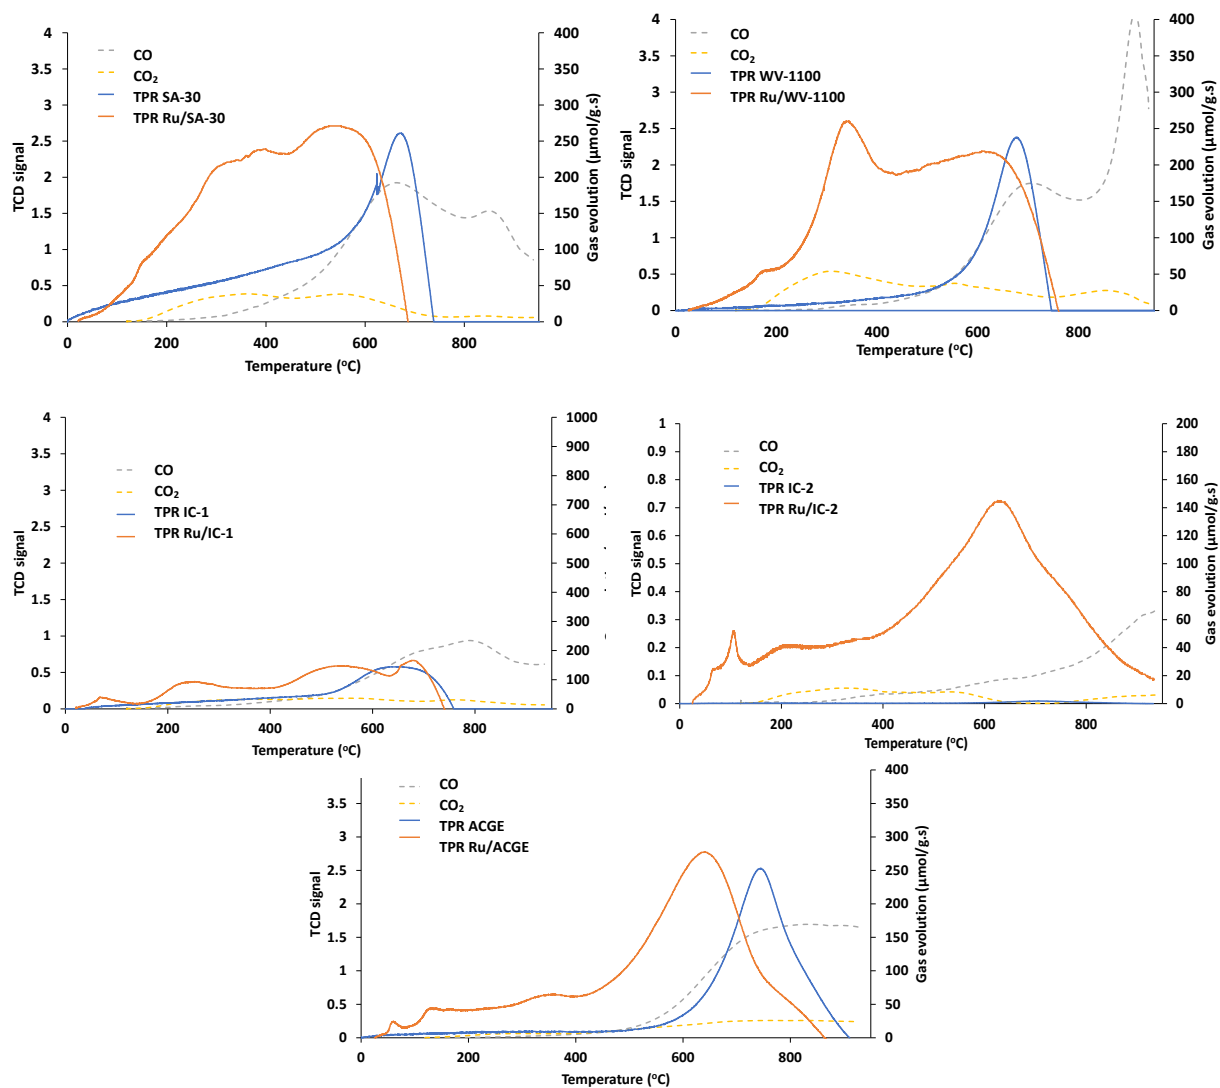

Fig. S6 TPD (right axis) and TPR (left axis) signals of Ru/C catalysts.

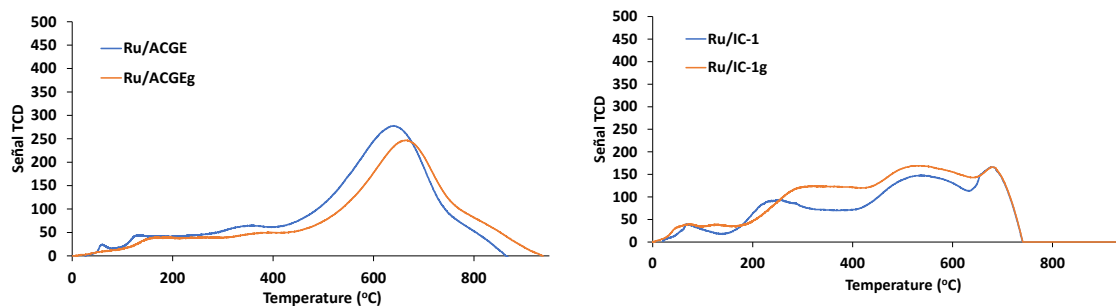

Fig. S7 Comparison of H<sub>2</sub>-TPR's profiles for the spherical catalysts and the grounded counterparts.

Table S6. O wt.% corresponding to different oxygen species determined by XPS.

|           |                          | O wt. % |      |      |
|-----------|--------------------------|---------|------|------|
| Species   |                          | O 1*    | O 2* | O 3* |
| BE (eV)   |                          | 531     | 533  | 534  |
| Catalysts | Ru/IC-1                  | 3.5     | 3.7  | 1.6  |
|           | Ru <sup>R</sup> /IC-1    | 1.7     | 3.1  | 0.7  |
|           | Ru/IC-2                  | 2.3     | 2.7  | 1.0  |
|           | Ru <sup>R</sup> /IC-2    | 1.8     | 2.6  | 0.6  |
|           | Ru/ACGE                  | 2.9     | 3.3  | 1.7  |
|           | Ru <sup>R</sup> /ACGE    | 2.6     | 3.4  | 1.9  |
|           | Ru/SA-30                 | 5.1     | 5.0  | 2.8  |
|           | Ru <sup>R</sup> /SA-30   | 3.0     | 3.5  | 1.2  |
|           | Ru/WV-1100               | 4.4     | 6.0  | 2.2  |
|           | Ru <sup>R</sup> /WV-1100 | 3.9     | 4.1  | 1.4  |

\*O1- carbonyl and anhydride groups (B.E.~531 eV), O2 -phenol groups (B.E.~533 eV) and O3-carboxylic groups (B.E.~534 eV)



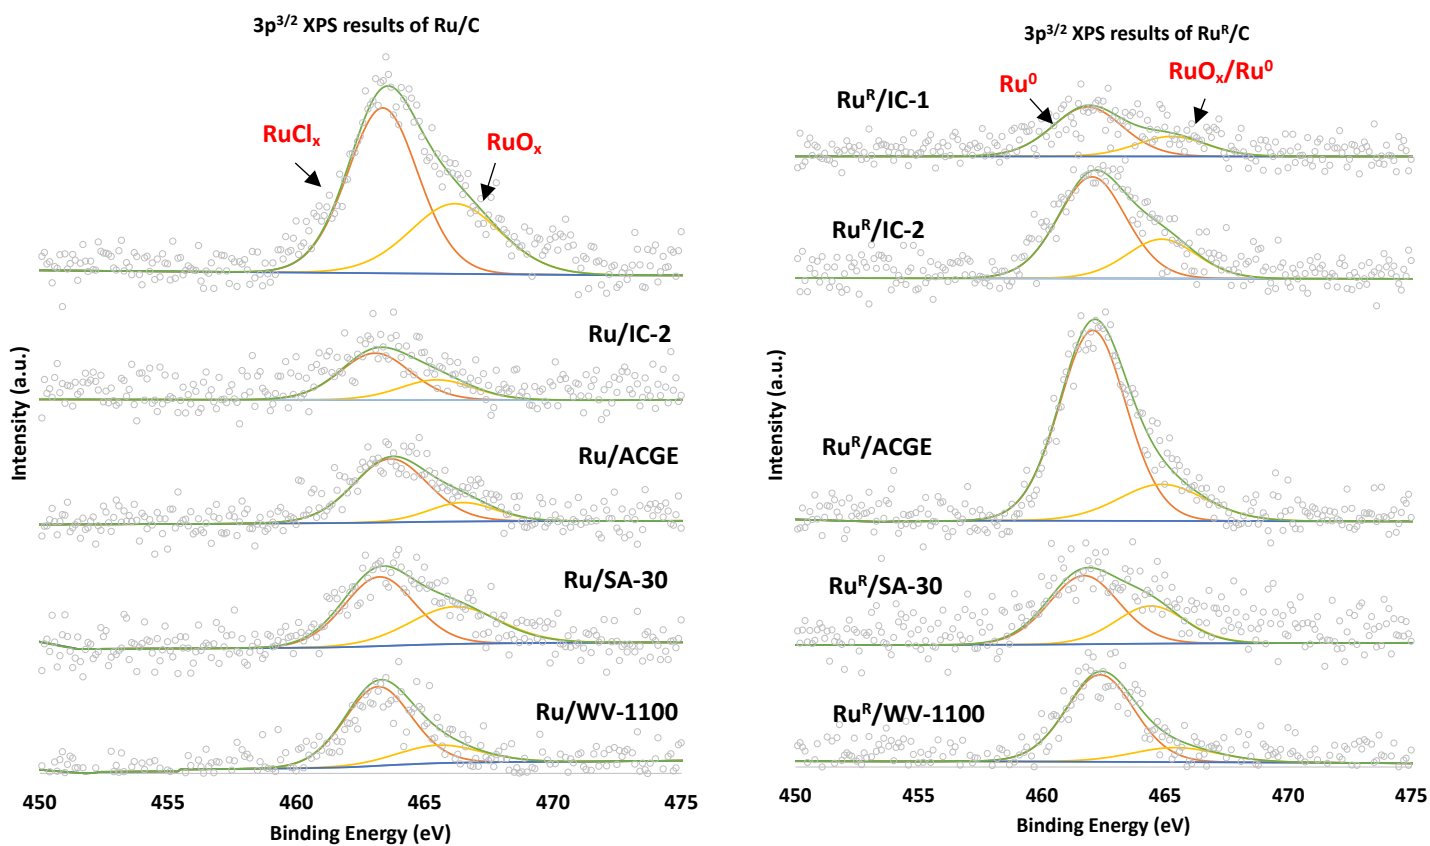

Fig. S8 Ru 3p<sub>3/2</sub> XPS results of the Ru/C catalysts (as prepared on the left and reduced on the right).

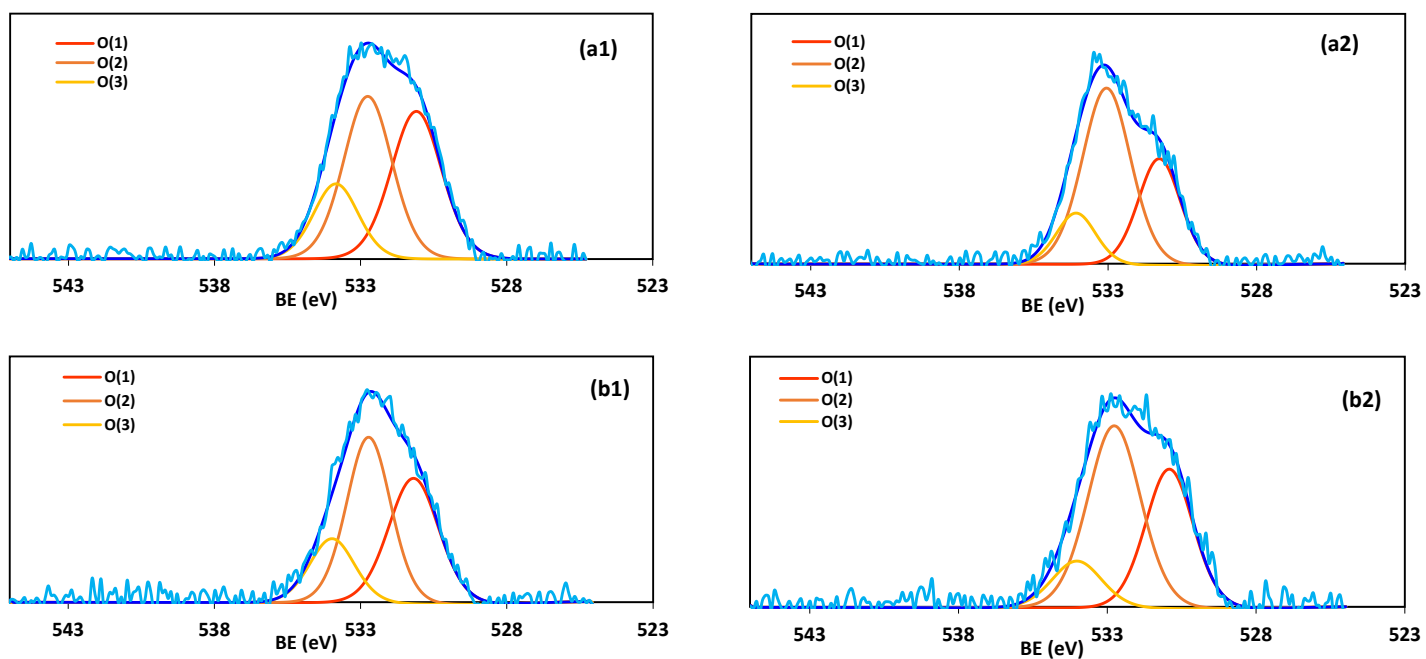

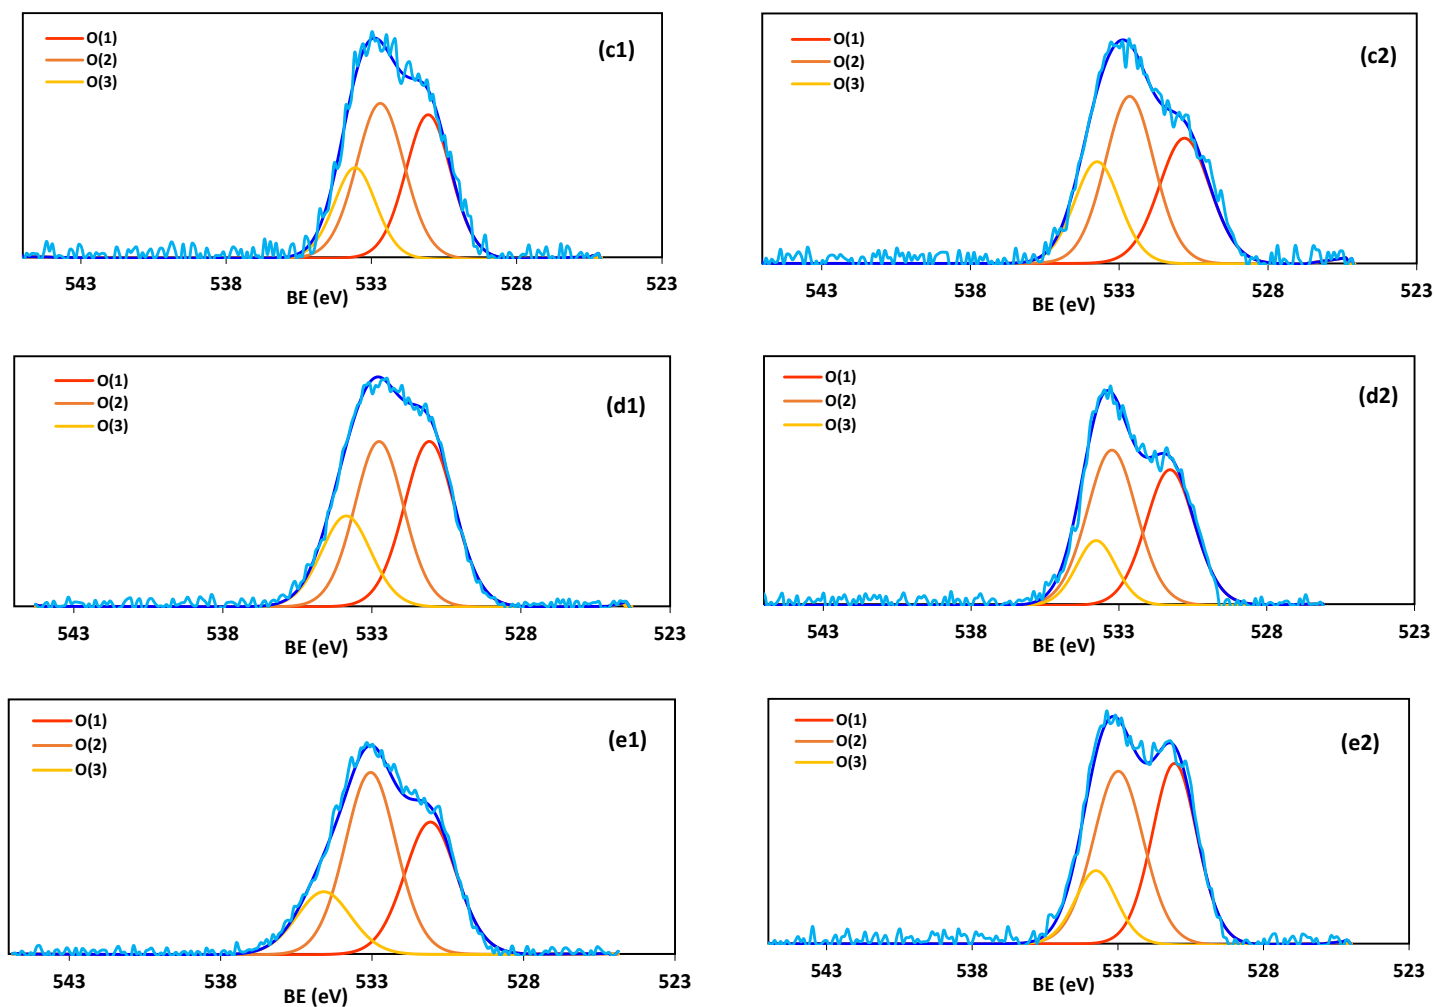

**Fig. S9** O1s XPS data of the Ru/C (1) and Ru<sup>R</sup>/C (2) catalysts where C is: a) IC-1 , b) IC-2 c) ACGE, d) SA-30 and e) WV-1100. Identified of oxygen species is as follows: O1- carbonyl and anhydride groups (B.E.≈531 eV), O2 -phenol groups (B.E≈533 eV) and O3-carboxylic groups (B.E.≈534 eV) <sup>4-6</sup>.

**Ru<sup>R</sup>/SA-30 (previously reduced)**

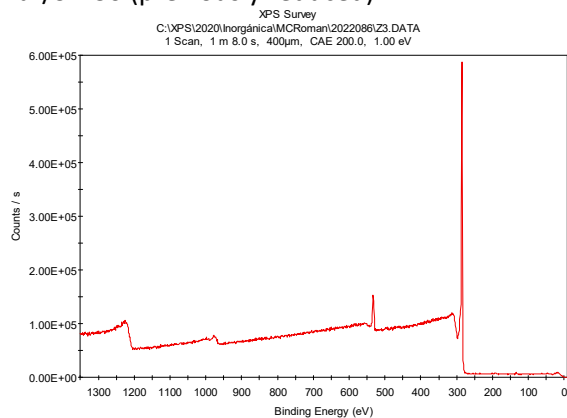

**Ru/SA-30 (fresh)**

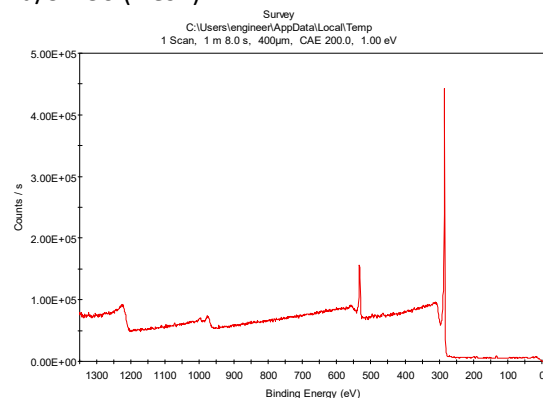

**Ru<sup>R</sup>/WV-1100 (previously reduced)**

**Ru/WV-1100 (fresh)**

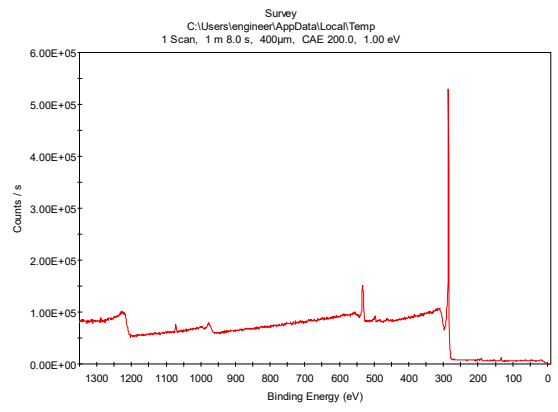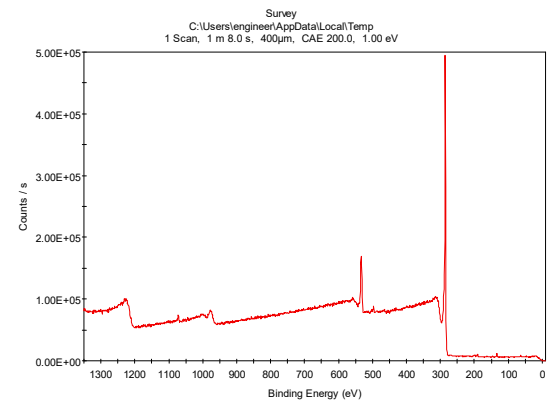

**Ru<sup>R</sup>/IC-1 (previously reduced)**

**Ru/IC-1 (fresh)**

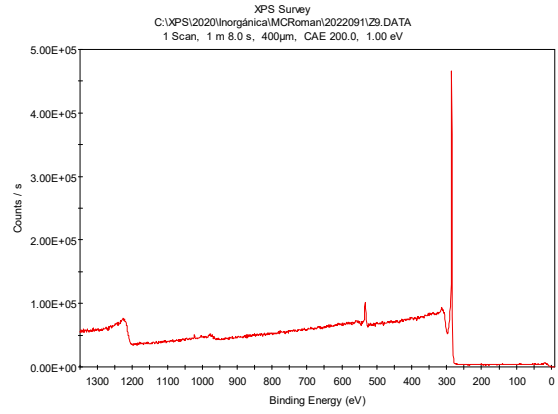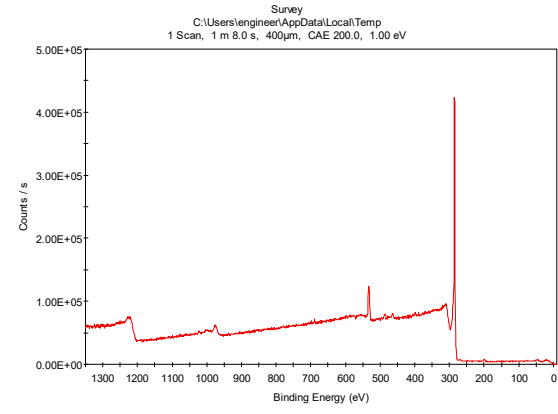

**Ru<sup>R</sup>/IC-2 (previously reduced)**

**Ru/IC-2 (fresh)**

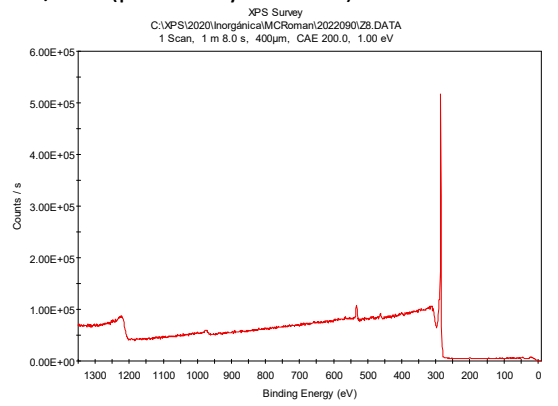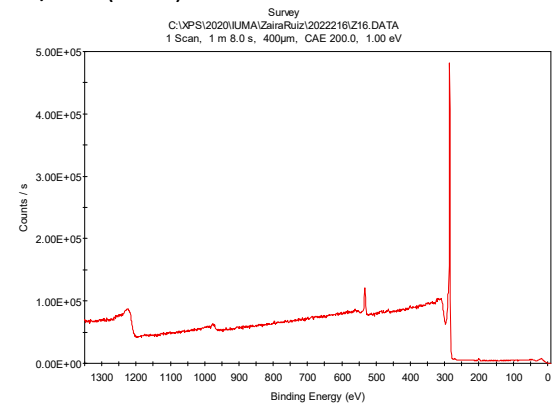

Ru<sup>R</sup>/ACGE (previously reduced)

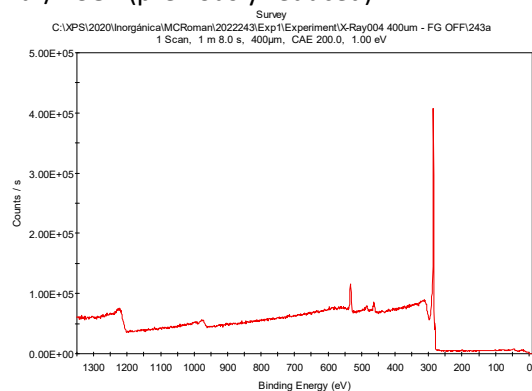

Ru/ACGE (fresh)

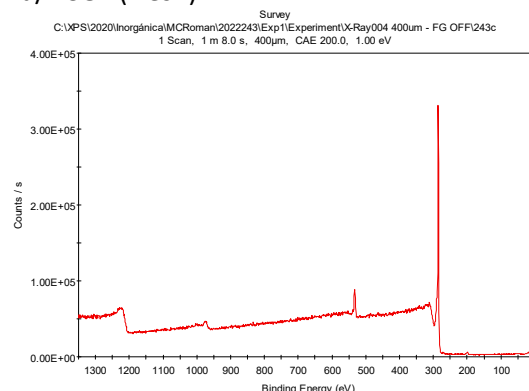

Fig. S10 Survey XPS data

Table S7. Atomic % of the elements determined by XPS in the Ru/C catalysts

| Catalyst                 | At. % |       |       |      |      | total |
|--------------------------|-------|-------|-------|------|------|-------|
|                          | Ru    | C     | O     | Cl   | P    |       |
| Ru/IC-1                  | 0.82  | 91.32 | 7.24  | 0.62 | -    | 100   |
| Ru <sup>R</sup> /IC-1    | 0.24  | 95.18 | 4.31  | 0.2  | -    | 100   |
| Ru/IC-2                  | 0.24  | 94.66 | 4.70  | 0.4  | -    | 100   |
| Ru <sup>R</sup> /IC-2    | 0.46  | 95.34 | 3.92  | 0.27 | -    | 100   |
| Ru/ACGE                  | 0.39  | 92.73 | 6.3   | 0.58 | -    | 100   |
| Ru <sup>R</sup> /ACGE    | 0.91  | 92.4  | 6.49  | 0.20 | -    | 100   |
| Ru/SA-30                 | 0.32  | 88.41 | 10.32 | 0.27 | 0.66 | 99.98 |
| Ru <sup>R</sup> /SA-30   | 0.27  | 93.14 | 6.02  | 0.05 | 0.51 | 99.99 |
| Ru/WV-1100               | 0.25  | 88.56 | 10.12 | 0.23 | 0.83 | 99.99 |
| Ru <sup>R</sup> /WV-1100 | 0.29  | 90.88 | 7.55  | 0.29 | 0.98 | 99.99 |
| Ru/IC-1 used             | 2.38  | 78.3  | 19.23 | 0.1  | 0    | 100   |
| Ru/SA-30 used            | 0.24  | 86.29 | 9.96  | 0.1  | 0.44 | 100   |

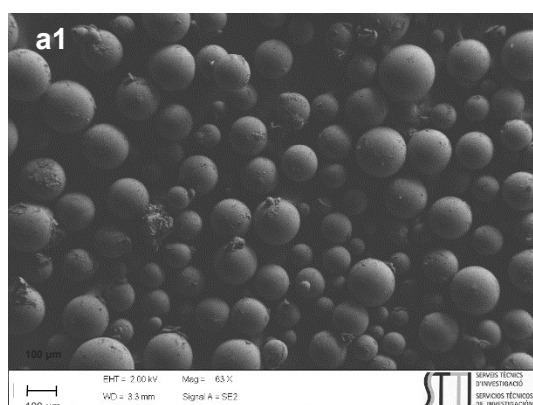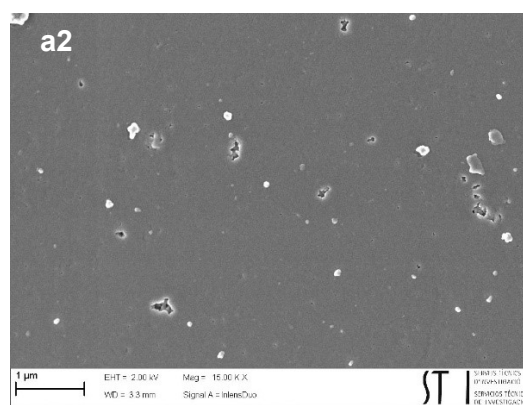

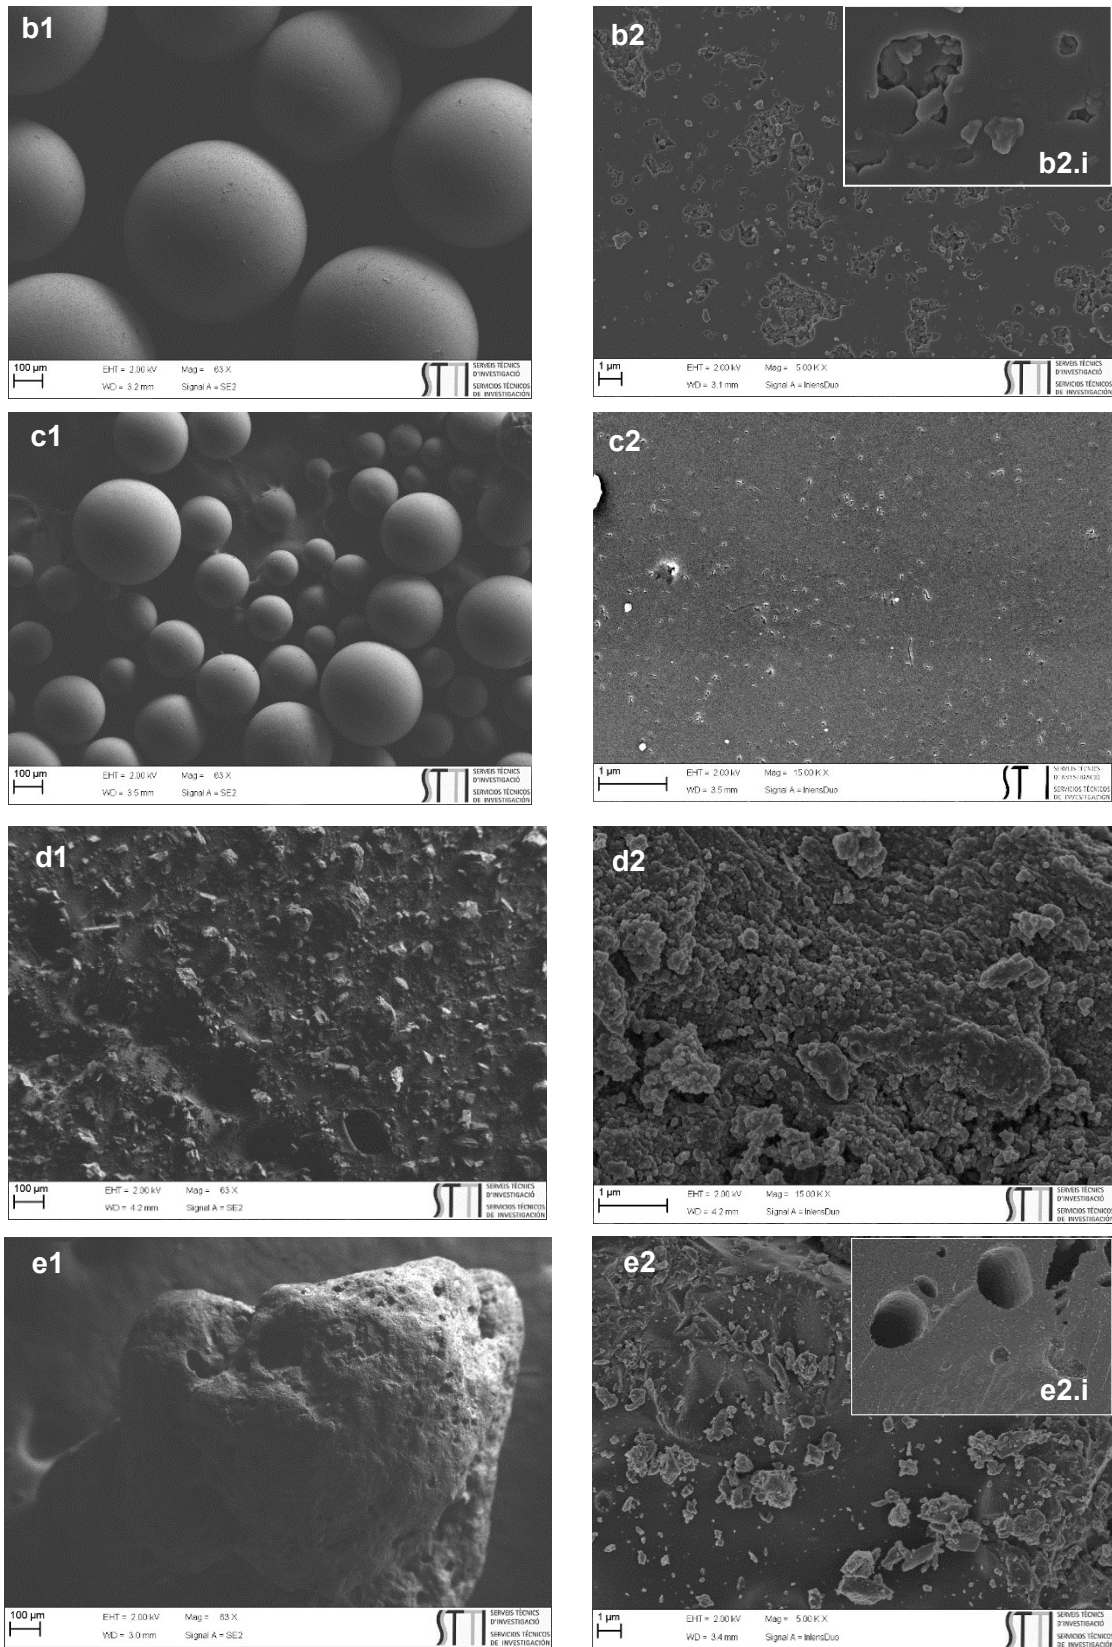

**Fig. S11** FESEM images of carbon materials: IC-1 (a1 and a2), IC-2 (b1, b2 and b2.i), ACGE (c1 and c2), SA-30 (d1 and d2) and WV-1100 (e1, e2 and e2.i).

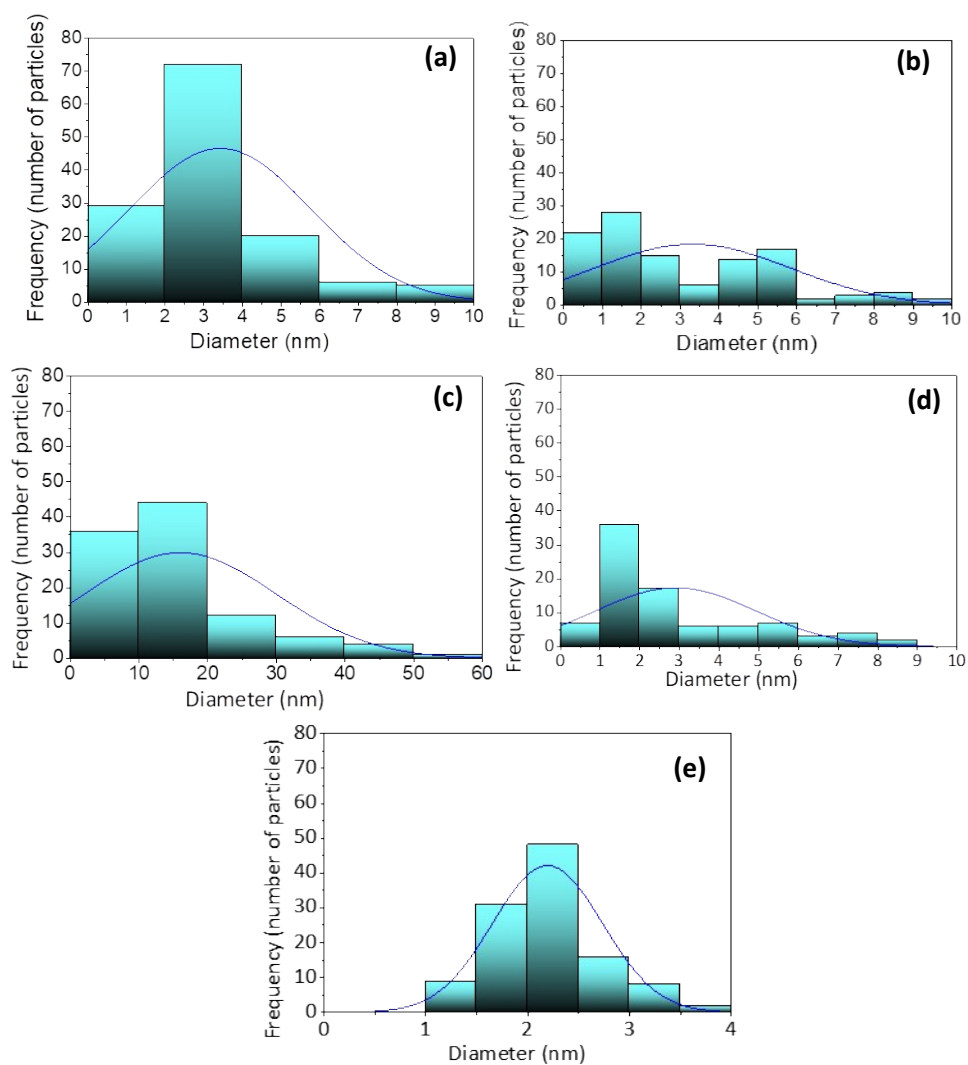

**Fig. S12** Particle size distribution for: (a) Ru<sup>R</sup>/IC-1, (b) Ru<sup>R</sup>/IC-2, (c) Ru<sup>R</sup>/ACGE, (d) Ru<sup>R</sup>/SA-30 and (e) Ru<sup>R</sup>/WV-1100 (be aware of the different scale in x-axis of the different figures).

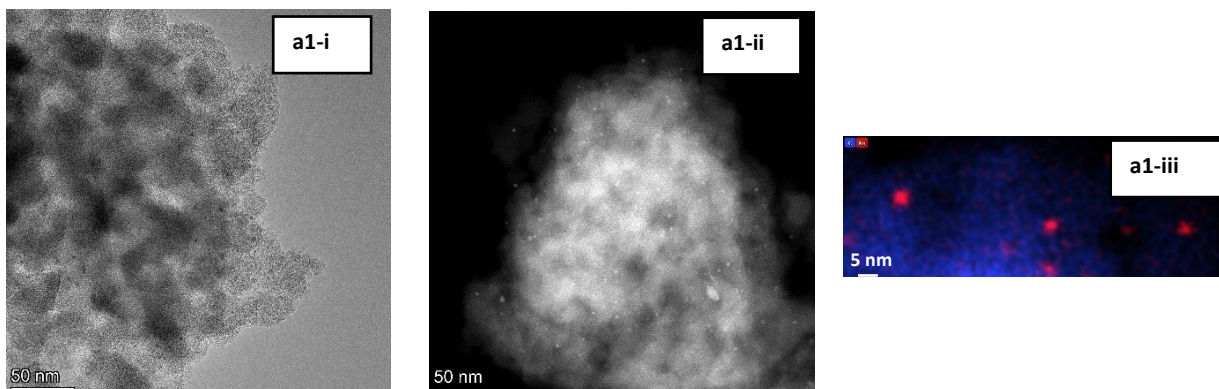

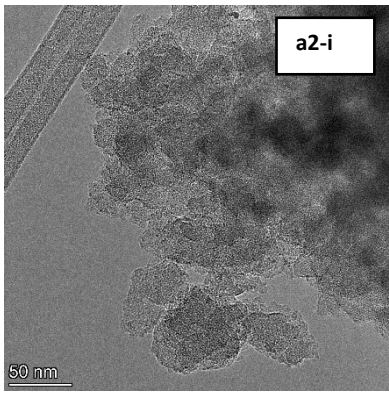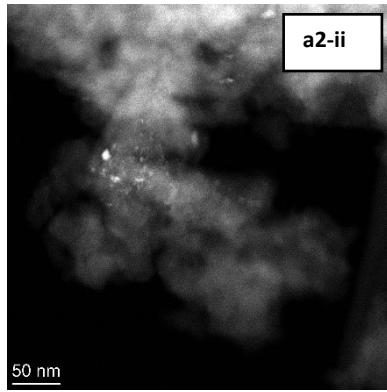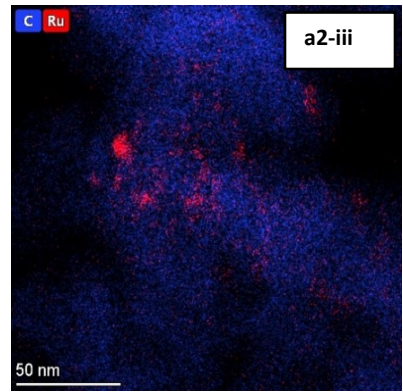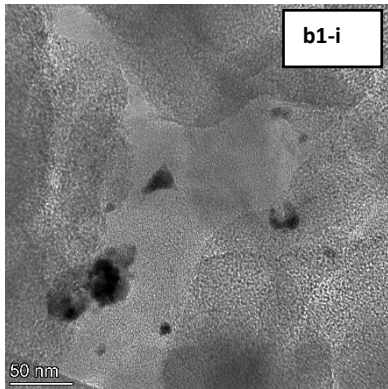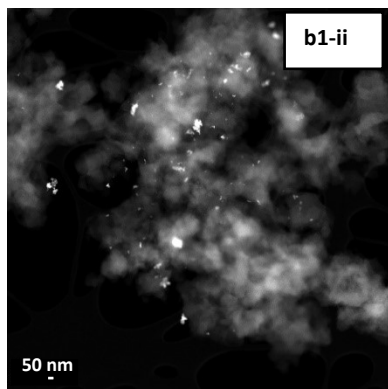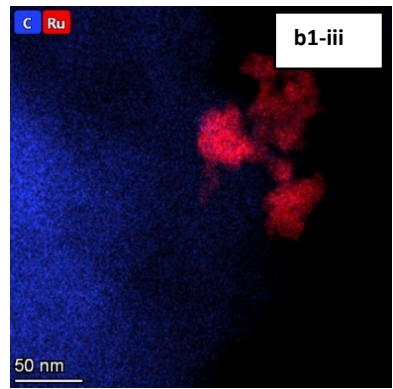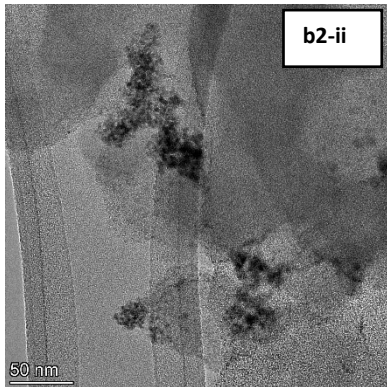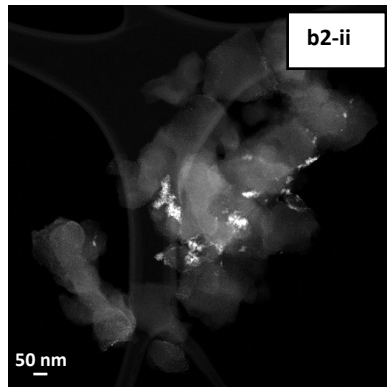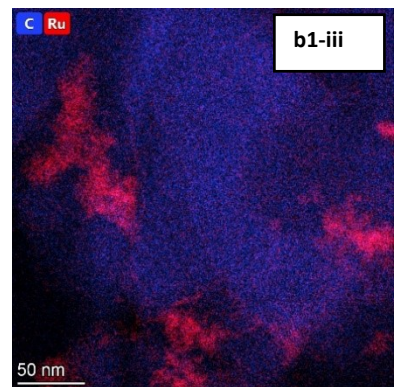

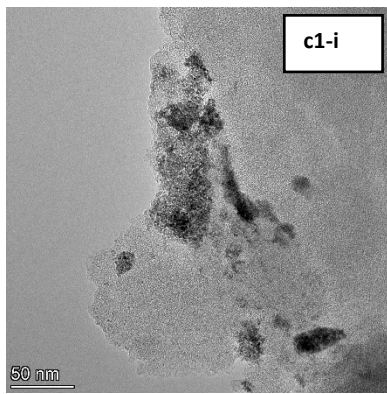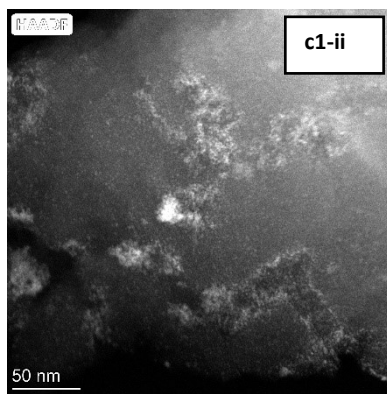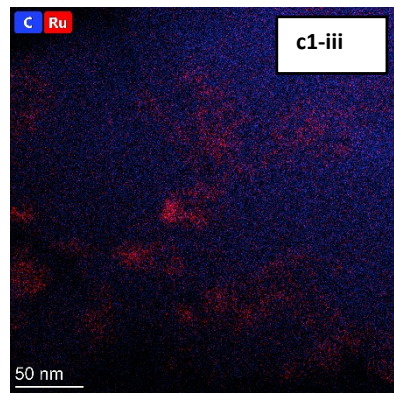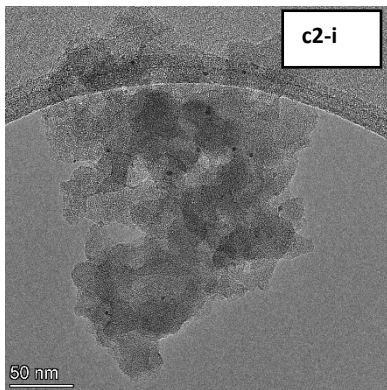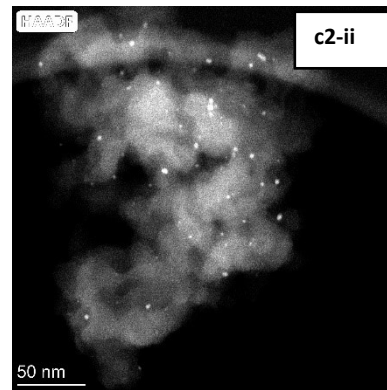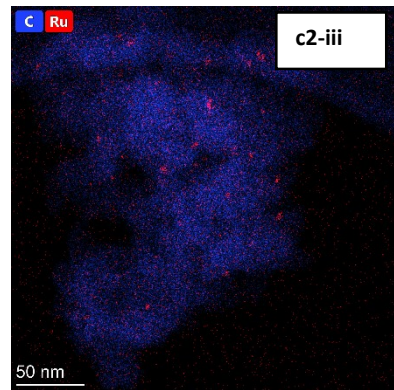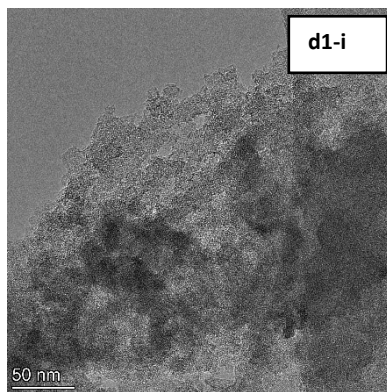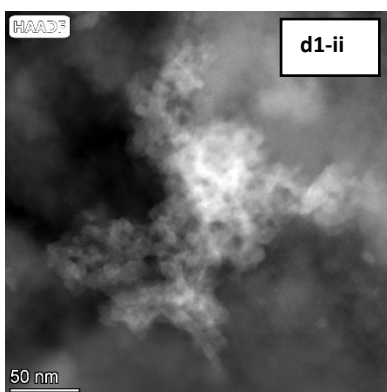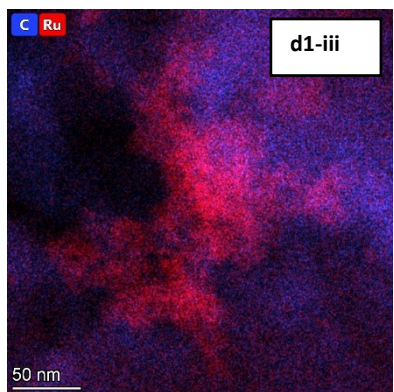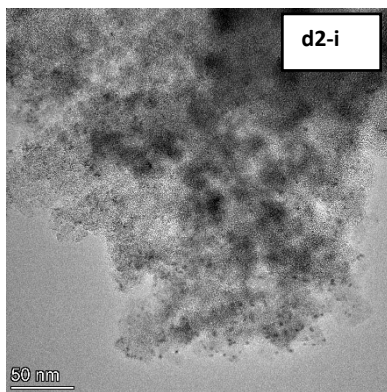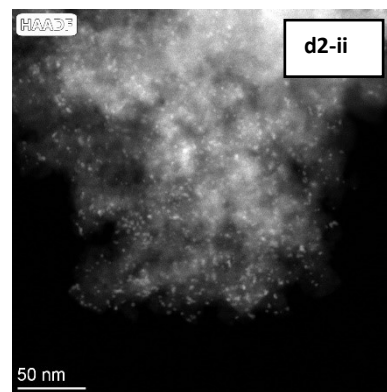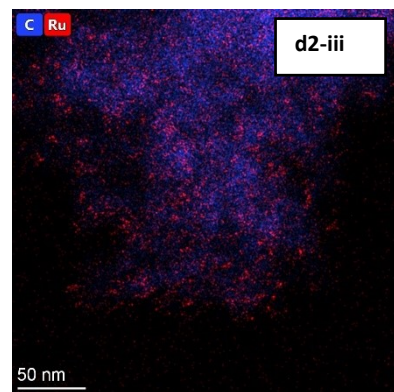



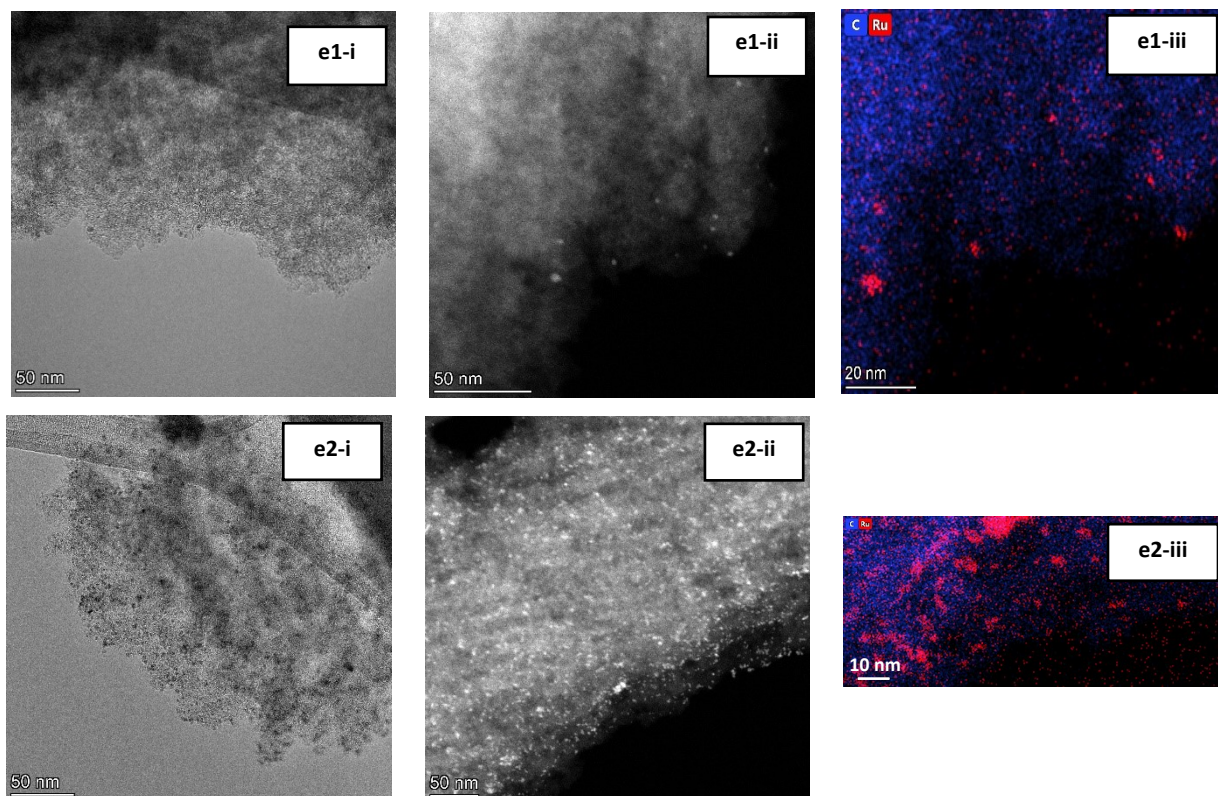

**Fig. S13** TEM images of spent catalysts that have been either used as prepared (images a1-e1) and previous reduced (images a2-e2) (reaction conditions: 70°C, 15 bar H<sub>2</sub>, 1 h). Each letter refers to the catalyst prepared with each support: a for IC-1, b for IC-2, c for ACGE, d for SA-30 and e for WV-1100. The first column corresponds to TEM images (i), the second corresponds to STEM HAADF (ii) and the third one to EDX images (iii).

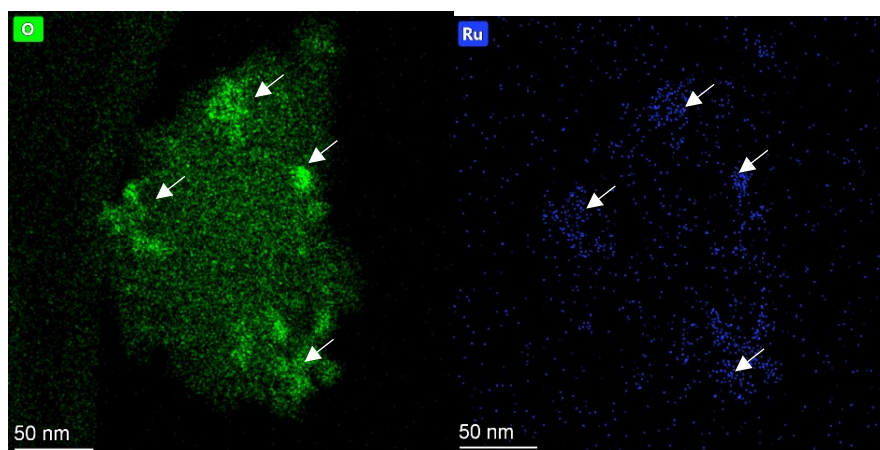

**Fig. S14.** O and Ru mapping of the Ru/WV catalyst

## References:

- 1 A. P. Terzyk, P. A. Gauden and P. Kowalczyk, *Carbon*, 2002, **40**, 2879–2886.
- 2 J. L. Figueiredo, M. F. R. Pereira, M. M. A. Freitas and J. J. M. Órfão, *Carbon*, 1999, **37**, 1379–1389.
- 3 G. S. Szymański, Z. Karpiński, S. Biniak and A. Świątkowski, *Carbon*, 2002, **40**, 2627–2639.
- 4 F.-Z. Azar, M. A. Lillo-Ródenas and M. C. Román-Martínez, *SN Appl. Sci.*, 2019, **1**, 1739.
- 5 I. Velo-Gala, J. J. López-Peñalver, M. Sánchez-Polo and J. Rivera-Utrilla, *Carbon*, 2014, **67**, 236–249.
- 6 T. I. T. Okpalugo, P. Papakonstantinou, H. Murphy, J. McLaughlin and N. M. D. Brown, *Carbon*, 2005, **43**, 153-161.
